# Supplementary material for: Effect of dietary concentrate to forage ratio on growth performance, rumen fermentation and bacterial diversity of Tibetan sheep under barn feeding on the Qinghai-Tibetan plateau
Source: PeerJ. 2019 Aug 5;7:e7462. doi: 10.7717/peerj.7462 (PMC6686838; doi:10.7717/peerj.7462)
Supplement: Supplemental Information 1 — The treatment HS1= concentrate to forage ratio 0:100, HS2= concentrate to forage ratio 15:85, HS3= concentrate to forage ratio 30:70, HS4= concentrate to forage ratio 45:55, HS5=concentrate to forage ratio 60:40. DMI=dry matter intake; DM consume= DMI × t, t is experimental time(d), BW=body weight; ADG= average daily BW gain. FCR= feed conversion ratio. [file peerj-07-7462-s001.xlsx]

## Sheet: Sheet1
	HS1(0:100)
	Number	Initial BW(Kg)	Final BW (Kg)	DMI(Kg)	DMI(g/d)	DM consume(Kg)	BW gain (Kg)	ADG(g/d)	Ggin rate (%)	FCR (%)
	8666	21	22.5	0.75	750	60	1.5	18.75	7.14286	40
	8646	22	24.5	0.67	670	53.6	2.5	31.25	11.3636	21.44
	8628	22.5	26	0.66825	668.25	53.46	3.5	43.75	15.5556	15.2743
	8645	21	23.5	0.604128	604.128	48.3302	2.5	31.25	11.9048	19.3321
	8632	21	24.5	0.6405	640.5	51.24	3.5	43.75	16.6667	14.64
	8630	22	23.5	0.715	715	57.2	1.5	18.75	6.81818	38.1333
	8647	21.5	24	0.671015	671.015	53.6812	2.5	31.25	11.6279	21.4725
	xxxx	19.5	22	0.6435	643.5	51.48	2.5	31.25	12.8205	20.592
	Average	21.3125	23.8125	0.670299	670.299	53.6239	2.5	31.25	11.7375	23.8605
	Std	0.923406	1.25178	0.0452611	45.2611	3.62089	0.755929	9.44911	3.49566	9.75184
	HS2 (15:85)
	Number	Initial BW(Kg)	Final BW (Kg)	DMI(Kg)	DMI(g)	DM consume(Kg)	BW gain (Kg)	ADG(g/d)	Gain rate (%)	FCR (%)
	8663	26	30.5	0.897	897	71.76	4.5	56.25	17.3077	15.9467
	8664	21.5	25.5	0.71595	715.95	57.276	4	50	18.6047	14.319
	8657	21.5	26	0.7095	709.5	56.76	4.5	56.25	20.9302	12.6133
	8652	19.5	23.5	0.6084	608.4	48.672	4	50	20.5128	12.168
	8661	26.5	31	0.851445	851.445	68.1156	4.5	56.25	16.9811	15.1368
	8655	24	27.5	0.792	792	63.36	3.5	43.75	14.5833	18.1029
	8651	19.5	22.5	0.605475	605.475	48.438	3	37.5	15.3846	16.146
	8635	18.5	25	0.5735	573.5	45.88	6.5	81.25	35.1351	7.05846
	Average	22.125	26.4375	0.719159	719.159	57.5327	4.3125	53.9062	19.93	13.9364
	Std	3.05602	3.06405	0.120086	120.086	9.60688	1.03294	12.9117	6.53685	3.38176
	HS3(30:70)
	Number	Initial BW(Kg)	Final BW (Kg)	DMI(Kg)	DMI(g)	DM consume(Kg)	BW gain (Kg)	ADG(g/d)	Gain rate	FCR (%)
	8648	24	29.5	0.8184	818.4	65.472	5.5	68.75	22.9167	11.904
	8627	20	28.5	0.728	728	58.24	8.5	106.25	42.5	6.85176
	8649	20	27	0.74	740	59.2	7	87.5	35	8.45714
	8674	22.5	32	0.795375	795.375	63.63	9.5	118.75	42.2222	6.69789
	8634	20	27.5	0.6824	682.4	54.592	7.5	93.75	37.5	7.27893
	8659	21	25	0.756	756	60.48	4	50	19.0476	15.12
	8668	19.5	27	0.6045	604.5	48.36	7.5	93.75	38.4615	6.448
	8656	23	30.5	0.805	805	64.4	7.5	93.75	32.6087	8.58667
	Average	21.25	28.375	0.741209	741.209	59.2968	7.125	89.0625	33.7821	8.91805
	Std	1.69031	2.23207	0.0712182	71.2182	5.69746	1.70608	21.326	8.62703	3.06335
	HS4(45:55)
	Number	Initial BW(Kg)	Final BW (Kg)	DMI(Kg)	DMI(g)	DM consume(Kg)	BW gain (Kg)	ADG(g/d)	Gain rate(%)	FCR (%)
	8631	22	31.5	0.858	858	68.64	9.5	118.75	43.1818	7.22526
	8667	17.5	26.5	0.76547	765.47	61.2376	9	112.5	51.4286	6.80418
	8638	21.5	31.5	0.830996	830.996	66.4797	10	125	46.5116	6.64797
	8672	20.5	29	0.779	779	62.32	8.5	106.25	41.4634	7.33176
	344	21	33.5	0.798	798	63.84	12.5	156.25	59.5238	5.1072
	8642	17	26.5	0.728346	728.346	58.2677	9.5	118.75	55.8824	6.13344
	8688	20	31.5	0.7754	775.4	62.032	11.5	143.75	57.5	5.39409
	8654	19.5	28	0.9262	926.2	74.096	8.5	106.25	43.5897	8.71718
	Average	19.875	29.75	0.807677	807.677	64.6141	9.875	123.438	49.8852	6.67014
	Std	1.80772	2.61861	0.0622857	62.2857	4.98286	1.43303	17.9129	7.13253	1.1535
	HS5(60:40)
	Number	Initial BW(Kg)	Final BW (Kg)	DMI(Kg)	DMI(g)	DM consume(Kg)	BW gain (Kg)	ADG(g/d)	Gain rate	FCR (%)
	8640	20	28.5	0.802	802	64.16	8.5	106.25	42.5	7.54824
	8669	26	38.5	0.985642	985.642	78.8514	12.5	156.25	48.0769	6.30811
	8665	20	30.5	0.82	820	65.6	10.5	131.25	52.5	6.24762
	8653	21.5	32.5	0.81485	814.85	65.188	11	137.5	51.1628	5.92618
	8670	20.5	30.5	0.6642	664.2	53.136	10	125	48.7805	5.3136
	8673	22	31	0.91036	910.36	72.8288	9	112.5	40.9091	8.09209
	8641	25.5	36	0.894375	894.375	71.55	10.5	131.25	41.1765	6.81429
	8663	22	36	0.924	924	73.92	14	175	63.6364	5.28
	Average	22.1875	32.9375	0.851928	851.928	68.1543	10.75	134.375	48.5928	6.44126
	Std	2.34426	3.48914	0.098864	98.864	7.90912	1.79284	22.4105	7.55593	1.00217
