# Supplementary material for: Effect of dietary concentrate to forage ratio on growth performance, rumen fermentation and bacterial diversity of Tibetan sheep under barn feeding on the Qinghai-Tibetan plateau
Source: PeerJ. 2019 Aug 5;7:e7462. doi: 10.7717/peerj.7462 (PMC6686838; doi:10.7717/peerj.7462)
Supplement: Supplemental Information 2 [file peerj-07-7462-s002.doc]

**Supplementary materials**

**Effect of dietary concentrate to forage ratio on rumen fermentation, bacterial diversity and growth performance of Tibetan sheep under barn feeding on Qinghai-Tibetan plateau**

Hongjin Liu1,2,3 ,Tianwei Xu1,2,, Li Ma1,2,3, Xueping Han1,2,4, Xungang Wang1,2,3, Xiaoling Zhang1,2,3, Linyong Hu1,2 , NaZhao1,2, Yongwei Chen4, Li Pi1, Xinquan Zhao1,2, Shixiao Xu1,2

1Northwest Institute of Plateau Biology, Chinese Academy of Sciences, Xining, 810008, China

2Key Laboratory of Adaptation and Evolution of Plateau Biota, Chinese Academy of Sciences, Xining, 810008, China

3University of Chinese Academy of Science, Beijing, 10049, China

4Technology Extension Service of Animal Husbandry of Qinghai, Xining, 81008, China

***Corresponding author:** prof. Shixiao Xu, Northwest Plateau Institute of Biology, Chinese Academy of science, 810001 Xining, China; E-mail:sxxu@nwipb.cas.cn

**Table S1** The nutrition of concentrate and forage feed in the experiment

| Items | Concentrate feed | Forage feed |
| --- | --- | --- |
| Ingredient (%) | |  |
| CP | 15.78 | 6.31 |
| EE | 3.92 | 2.13 |
| Starch(mg/g) | 43.42 | 25.58 |
| ADF | 5.11 | 34.1 |
| NDF | 13.89 | 57.64 |
| Calcium | 0.82 | 0.35 |
| Magnesium | 0.48 | 0.24 |
| Phosphorus | 0.57 | 0.22 |

CP=crude protein; EE= ether extract; ADF=acid detergent; NDF= natural detergent fiber.

**Table S2** The statistics of raw rate across the 20 different samples

| Sample Name | Raw PE | Combined | Qualified | Taxon Tags | OTUs | Q30 | GC% | Effective% |
| --- | --- | --- | --- | --- | --- | --- | --- | --- |
| HS1.1 | 83,751 | 81,974 | 80,575 | 77,412 | 1,836 | 98.40 | 53.26 | 95.81 |
| HS1.2 | 71,167 | 69,347 | 68,147 | 64,413 | 2,986 | 98.43 | 53.34 | 95.18 |
| HS1.3 | 84,189 | 82,243 | 80,774 | 75,358 | 2,876 | 98.26 | 53.31 | 95.36 |
| HS1.4 | 80,635 | 78,727 | 77,427 | 73,322 | 2,957 | 98.41 | 53.88 | 95.43 |
| HS2.1 | 68,348 | 66,703 | 65,502 | 62,400 | 2,559 | 98.37 | 53.16 | 95.34 |
| HS2.2 | 84,011 | 82,072 | 80,659 | 76,112 | 3,246 | 98.36 | 53.35 | 95.35 |
| HS2.3 | 78,049 | 76,242 | 75,028 | 71,101 | 2,836 | 98.48 | 53.45 | 95.71 |
| HS2.4 | 70,210 | 68,289 | 67,159 | 63,948 | 3,039 | 98.42 | 53.26 | 94.90 |
| HS3.1 | 71,873 | 70,097 | 68,868 | 65,248 | 3,022 | 98.29 | 53.39 | 95.13 |
| HS3.2 | 68,958 | 67,162 | 65,970 | 61,754 | 3,074 | 98.31 | 53.42 | 95.04 |
| HS3.3 | 70,010 | 68,356 | 67,247 | 63,251 | 2,860 | 98.36 | 53.53 | 95.3 |
| HS3.4 | 82,672 | 80,373 | 78,975 | 75,355 | 3,059 | 98.37 | 53.39 | 94.88 |
| HS4.1 | 69,154 | 67,489 | 66,445 | 63,817 | 2,611 | 98.40 | 53.19 | 95.64 |
| HS4.2 | 73,388 | 71,859 | 70,699 | 67,462 | 1,839 | 98.34 | 53.39 | 96.00 |
| HS4.3 | 67,758 | 66,318 | 65,063 | 62,529 | 1,753 | 98.31 | 52.73 | 95.73 |
| HS4.4 | 69,781 | 68,422 | 67,195 | 63,586 | 1,601 | 98.30 | 53.05 | 96.08 |
| HS5.1 | 69,879 | 68,441 | 67,334 | 64,434 | 1,728 | 98.41 | 53.64 | 96.03 |
| HS5.2 | 78,138 | 75,165 | 73,668 | 70,164 | 1,635 | 98.21 | 53.28 | 94.02 |
| HS5.3 | 74,180 | 72,582 | 71,389 | 68,478 | 1,967 | 98.36 | 52.97 | 95.93 |
| HS5.4 | 81,456 | 79,812 | 78,439 | 74,861 | 1,732 | 98.31 | 53.05 | 96.05 |

**Table S3** The relative abundance of the total phyla detected by taxonomic analysis (%)

| Taxonomy | Groups | | | | | avergege |
| --- | --- | --- | --- | --- | --- | --- |
| HS1 | HS2 | HS3 | HS4 | HS5 |
| Bacteroidetes | 50.0842 | 42.5576 | 45.3258 | 62.5178 | 60.4256 | 52.1822 |
| Proteobacteria | 22.2601 | 27.0355 | 23.7143 | 13.6692 | 15.0205 | 20.33992 |
| Firmicutes | 13.2894 | 13.7708 | 15.8411 | 15.884 | 12.915 | 14.34006 |
| Lentisphaerae | 6.1709 | 6.0401 | 4.9134 | 3.2629 | 6.6955 | 5.41656 |
| Fibrobacteres | 1.3113 | 1.8703 | 0.9493 | 0.7935 | 1.3266 | 1.2502 |
| Cyanobacteria | 0.9396 | 0.9117 | 1.1461 | 0.7502 | 1.4327 | 1.03606 |
| Acidobacteria | 1.344 | 1.6137 | 1.6489 | 0.2283 | 0.0049 | 0.96796 |
| Tenericutes | 1.3428 | 1.6294 | 1.6586 | 1.4655 | 1.3606 | 1.49138 |
| Actinobacteria | 0.872 | 1.5181 | 2.0857 | 0.3222 | 0.0227 | 0.96414 |
| Verrucomicrobia | 0.5093 | 0.4676 | 0.3048 | 0.0765 | 0.017 | 0.27504 |
| Spirochaetes | 0.4255 | 0.6789 | 0.4643 | 0.3729 | 0.4044 | 0.4692 |
| Gemmatimonadetes | 0.2708 | 0.4097 | 0.4571 | 0.0773 | 0.0028 | 0.24354 |
| Chloroflexi | 0.2672 | 0.368 | 0.4457 | 0.0769 | 0.0231 | 0.23618 |
| Nitrospirae | 0.2182 | 0.2725 | 0.1943 | 0.0356 | 0.002 | 0.14452 |
| Planctomycetes | 0.0919 | 0.1194 | 0.1838 | 0.0243 | 0.0057 | 0.08502 |
| Synergistetes | 0.0806 | 0.068 | 0.0587 | 0.066 | 0.034 | 0.06146 |
| Elusimicrobia | 0.0826 | 0.0992 | 0.0891 | 0.0356 | 0.0526 | 0.07182 |
| SHA-109 | 0.0065 | 0.0117 | 0.0113 | 0.0255 | 0.0045 | 0.0119 |
| Saccharibacteria | 0.0113 | 0.0389 | 0.0146 | 0.0194 | 0.0117 | 0.01918 |
| Chlamydiae | 0.0328 | 0.032 | 0.0267 | 0.0227 | 0.0336 | 0.02956 |
| Euryarchaeota | 0.0219 | 0.0194 | 0.0182 | 0.0186 | 0.0239 | 0.0204 |
| Latescibacteria | 0.032 | 0.0316 | 0.0267 | 0.0069 | 0 | 0.01944 |
| Chlorobi | 0.019 | 0.0385 | 0.03 | 0.0061 | 0 | 0.01872 |
| Candidate_division_SR1 | 0.0024 | 0.0202 | 0.0146 | 0.0085 | 0.0069 | 0.01052 |
| Armatimonadetes | 0.0109 | 0.0194 | 0.0166 | 0.002 | 0 | 0.00978 |
| Fusobacteria | 0.0049 | 0.0032 | 0.0138 | 0.0024 | 0.0061 | 0.00608 |
| Thermomicrobia | 0.0012 | 0.0073 | 0.0158 | 0.0016 | 0 | 0.00518 |
| JL-ETNP-Z39 | 0 | 0.0024 | 0.0109 | 0.0004 | 0 | 0.00274 |
| Thaumarchaeota | 0 | 0.0028 | 0.0053 | 0.0032 | 0.0008 | 0.00242 |
| Caldiserica | 0.0024 | 0.0065 | 0.0057 | 0 | 0 | 0.00292 |
| Parcubacteria | 0.0016 | 0.0024 | 0.0016 | 0 | 0 | 0.00112 |
| TM6 | 0.0024 | 0.0016 | 0.0004 | 0.0024 | 0 | 0.00136 |
| Candidate_division_OP3 | 0.002 | 0.0024 | 0.0008 | 0 | 0 | 0.00104 |
| WCHB1-60 | 0.0016 | 0.002 | 0.0012 | 0 | 0 | 0.00096 |
| Omnitrophica | 0.0008 | 0.0012 | 0 | 0 | 0 | 0.0004 |
| Hydrogenedentes | 0 | 0.0008 | 0 | 0 | 0 | 0.00016 |
| Deferribacteres | 0.0004 | 0.0004 | 0.0012 | 0 | 0 | 0.0004 |
| Aerophobetes | 0 | 0.0004 | 0.0004 | 0.0004 | 0 | 0.00024 |
| Thermotogae | 0.0004 | 0 | 0.0004 | 0 | 0 | 0.00016 |
| GOUTA4 | 0.0008 | 0 | 0 | 0 | 0 | 0.00016 |

The treatments HS1, HS2, HS3, HS4 and HS5 refer to the C:F ratios of 0:100, 15:85, 30:70, 45:55 and 60:40, respectively.

**Table S4** The relative abundance of total genus detected by taxonomic analysis (%)

| Taxonomy | Groups | | | | | Average |
| --- | --- | --- | --- | --- | --- | --- |
| HS1 | HS2 | HS3 | HS4 | HS5 |
| Prevotella_1 | 19.6225 | 18.3108 | 21.8010 | 39.1672 | 35.1513 | 26.8106 |
| Ruminobacter | 7.5876 | 6.0887 | 7.6767 | 3.4465 | 5.3562 | 6.0311 |
| Succinivibrionaceae_UCG-002 | 5.2903 | 11.0201 | 6.0547 | 6.1211 | 7.0781 | 7.1128 |
| Rikenellaceae_RC9_gut_group | 6.2063 | 4.6847 | 5.4145 | 3.5053 | 3.8518 | 4.7325 |
| Succinivibrio | 0.8221 | 1.6895 | 0.8178 | 0.3633 | 1.1071 | 0.9599 |
| Erysipelotrichaceae_UCG-004 | 1.5265 | 1.1530 | 1.2069 | 0.8798 | 0.6796 | 1.0892 |
| Prevotellaceae_UCG-003 | 2.6476 | 1.9713 | 2.1872 | 3.2122 | 3.2230 | 2.6483 |
| Fibrobacter | 0.9846 | 1.7375 | 0.8906 | 0.5608 | 0.8669 | 1.0081 |
| Ruminococcus_2 | 0.5387 | 0.3816 | 0.5921 | 1.2561 | 0.4129 | 0.6363 |
| Prevotellaceae_UCG-001 | 0.9592 | 0.7589 | 1.0963 | 1.7025 | 1.6317 | 1.2297 |
| Christensenellaceae_R-7_group | 1.1810 | 0.9565 | 1.5967 | 1.3359 | 1.0245 | 1.2189 |
| Ruminococcaceae_NK4A214_group | 1.0499 | 0.8788 | 1.4887 | 1.2409 | 0.8037 | 1.0924 |
| Succinimonas | 0.1738 | 0.3282 | 0.8048 | 0.0675 | 0.2348 | 0.3218 |
| Selenomonas_1 | 0.2737 | 0.2580 | 0.3643 | 1.0504 | 0.2348 | 0.4362 |
| Ruminococcaceae_UCG-014 | 0.6866 | 0.5565 | 0.7875 | 0.8588 | 0.4669 | 0.6713 |
| Saccharofermentans | 0.5484 | 0.4092 | 0.7935 | 0.6526 | 0.3492 | 0.5506 |
| Prevotellaceae_NK3B31_group | 0.1328 | 0.0680 | 0.0707 | 0.2035 | 0.4059 | 0.1762 |
| Victivallis | 0.7044 | 0.7892 | 0.6251 | 0.4118 | 0.3897 | 0.5840 |
| Ruminococcaceae_UCG-010 | 0.7233 | 0.7773 | 0.7875 | 0.5209 | 0.5997 | 0.6817 |
| Succiniclasticum | 0.2936 | 0.1895 | 0.3352 | 0.4016 | 0.2942 | 0.3028 |
| Butyrivibrio_2 | 0.2478 | 0.1927 | 0.3643 | 0.2845 | 0.2958 | 0.2770 |
| [Eubacterium]_coprostanoligenes_group | 0.3876 | 0.3924 | 0.4334 | 0.3703 | 0.2785 | 0.3724 |
| Treponema_2 | 0.2963 | 0.4561 | 0.3147 | 0.2170 | 0.2251 | 0.3018 |
| Lachnospiraceae_XPB1014_group | 0.3034 | 0.1846 | 0.3897 | 0.2774 | 0.2057 | 0.2722 |
| Quinella | 0.1598 | 0.1063 | 0.1382 | 0.2553 | 0.0907 | 0.1501 |
| SP3-e08 | 0.3206 | 0.2769 | 0.2003 | 0.1263 | 0.1727 | 0.2194 |
| Ruminococcaceae_UCG-002 | 0.3449 | 0.4043 | 0.3217 | 0.3174 | 0.1959 | 0.3168 |
| Ruminococcus_1 | 0.3260 | 0.2747 | 0.3973 | 0.2888 | 0.2359 | 0.3045 |
| Ruminococcaceae_UCG-013 | 0.2262 | 0.1970 | 0.2828 | 0.1393 | 0.1706 | 0.2032 |
| Lachnospiraceae_ND3007_group | 0.1851 | 0.1220 | 0.1932 | 0.1117 | 0.1166 | 0.1457 |
| Lachnospiraceae_AC2044_group | 0.1797 | 0.1447 | 0.2656 | 0.1592 | 0.1506 | 0.1800 |
| Thalassospira | 0.2753 | 0.3298 | 0.2780 | 0.1101 | 0.1252 | 0.2237 |
| Ruminiclostridium_5 | 0.1884 | 0.1544 | 0.2256 | 0.1436 | 0.1312 | 0.1686 |
| Prevotellaceae_YAB2003_group | 0.1090 | 0.1317 | 0.1090 | 0.2218 | 0.1657 | 0.1475 |
| Ruminococcaceae_UCG-005 | 0.2051 | 0.1420 | 0.2305 | 0.1506 | 0.1808 | 0.1818 |
| Prevotellaceae_UCG-004 | 0.1004 | 0.0853 | 0.1441 | 0.1058 | 0.1150 | 0.1101 |
| Pseudobutyrivibrio | 0.1716 | 0.1576 | 0.2321 | 0.1484 | 0.1479 | 0.1715 |
| Anaeroplasma | 0.1959 | 0.1927 | 0.2478 | 0.2024 | 0.1490 | 0.1976 |
| Pseudomonas | 0.0335 | 0.1220 | 0.0686 | 0.0049 | 0.0065 | 0.0471 |
| Prevotellaceae_Ga6A1_group | 0.1285 | 0.0874 | 0.0772 | 0.2332 | 0.1301 | 0.1313 |
| Sphingomonas | 0.0874 | 0.1797 | 0.1501 | 0.0000 | 0.0005 | 0.0836 |
| [Eubacterium]_ruminantium_group | 0.1652 | 0.0837 | 0.2111 | 0.1382 | 0.1144 | 0.1425 |
| Lachnospiraceae_NK3A20_group | 0.1301 | 0.1258 | 0.1517 | 0.1236 | 0.1641 | 0.1390 |
| Sphaerochaeta | 0.0529 | 0.0853 | 0.0410 | 0.0394 | 0.0286 | 0.0494 |
| Papillibacter | 0.1285 | 0.0939 | 0.1398 | 0.1026 | 0.1090 | 0.1148 |
| Lachnospiraceae_NK4A136_group | 0.0448 | 0.0189 | 0.0356 | 0.0766 | 0.0200 | 0.0392 |
| Fretibacterium | 0.0869 | 0.0675 | 0.0578 | 0.0556 | 0.0308 | 0.0597 |
| Desulfovibrio | 0.0766 | 0.0739 | 0.0637 | 0.0799 | 0.0464 | 0.0681 |
| Anaerosporobacter | 0.0378 | 0.0356 | 0.0448 | 0.0151 | 0.0993 | 0.0465 |
| Acetitomaculum | 0.0950 | 0.0513 | 0.1198 | 0.0718 | 0.0605 | 0.0797 |
| probable_genus_10 | 0.0615 | 0.0524 | 0.0891 | 0.0572 | 0.0696 | 0.0660 |
| Anaerovorax | 0.0642 | 0.0707 | 0.0793 | 0.0524 | 0.0540 | 0.0641 |
| Acidibacter | 0.0626 | 0.0464 | 0.0729 | 0.0011 | 0.0011 | 0.0368 |
| Anaerovibrio | 0.0437 | 0.0659 | 0.0777 | 0.0605 | 0.0421 | 0.0580 |
| Candidatus_Saccharimonas | 0.0146 | 0.0184 | 0.0157 | 0.0173 | 0.0097 | 0.0151 |
| Elusimicrobium | 0.0524 | 0.0659 | 0.0723 | 0.0238 | 0.0302 | 0.0489 |
| Moryella | 0.0561 | 0.0356 | 0.0513 | 0.0491 | 0.0405 | 0.0465 |
| Ruminococcaceae_UCG-001 | 0.0211 | 0.0167 | 0.0173 | 0.0119 | 0.0389 | 0.0212 |
| Oscillibacter | 0.0016 | 0.0027 | 0.0043 | 0.0259 | 0.0005 | 0.0070 |
| Veillonellaceae_UCG-001 | 0.0281 | 0.0200 | 0.0372 | 0.0351 | 0.0189 | 0.0279 |
| U29-B03 | 0.0313 | 0.0318 | 0.0399 | 0.0448 | 0.0313 | 0.0358 |
| Candidatus_Hepatincola | 0.0545 | 0.0432 | 0.0383 | 0.0146 | 0.0184 | 0.0338 |
| Spirochaeta_2 | 0.0486 | 0.0378 | 0.0378 | 0.0146 | 0.0308 | 0.0339 |
| unidentified_Gastranaerophilales | 0.0178 | 0.0167 | 0.0092 | 0.0065 | 0.0275 | 0.0155 |
| Bibersteinia | 0.0248 | 0.0124 | 0.0146 | 0.0043 | 0.0059 | 0.0124 |
| Lachnoclostridium_10 | 0.0389 | 0.0480 | 0.0318 | 0.0189 | 0.0162 | 0.0308 |
| Alloprevotella | 0.0227 | 0.0130 | 0.0200 | 0.0324 | 0.0173 | 0.0211 |
| Ruminiclostridium_9 | 0.0103 | 0.0027 | 0.0173 | 0.0167 | 0.0038 | 0.0101 |
| Pantoea | 0.0313 | 0.0356 | 0.0205 | 0.0097 | 0.0157 | 0.0226 |
| Acinetobacter | 0.0070 | 0.0135 | 0.0086 | 0.0016 | 0.0016 | 0.0065 |
| Lactobacillus | 0.0092 | 0.0119 | 0.0043 | 0.0173 | 0.0005 | 0.0086 |
| Candidatus_Methanomethylophilus | 0.0124 | 0.0130 | 0.0070 | 0.0076 | 0.0065 | 0.0093 |
| Alistipes | 0.0038 | 0.0022 | 0.0022 | 0.0130 | 0.0022 | 0.0046 |
| Oscillospira | 0.0270 | 0.0194 | 0.0232 | 0.0135 | 0.0130 | 0.0192 |
| [Anaerorhabdus]_furcosa_group | 0.0140 | 0.0108 | 0.0205 | 0.0162 | 0.0124 | 0.0148 |
| Cetobacterium | 0.0059 | 0.0011 | 0.0146 | 0.0016 | 0.0070 | 0.0060 |
| Ruminococcaceae_UCG-012 | 0.0135 | 0.0216 | 0.0264 | 0.0097 | 0.0162 | 0.0175 |
| Lachnoclostridium_1 | 0.0092 | 0.0049 | 0.0140 | 0.0130 | 0.0038 | 0.0090 |
| Mogibacterium | 0.0162 | 0.0086 | 0.0146 | 0.0189 | 0.0103 | 0.0137 |
| [Eubacterium]_nodatum_group | 0.0211 | 0.0162 | 0.0151 | 0.0238 | 0.0076 | 0.0167 |
| Solobacterium | 0.0157 | 0.0049 | 0.0167 | 0.0167 | 0.0130 | 0.0134 |
| Rhizobium | 0.0070 | 0.0124 | 0.0211 | 0.0027 | 0.0022 | 0.0091 |
| Oribacterium | 0.0200 | 0.0184 | 0.0227 | 0.0264 | 0.0173 | 0.0209 |
| Lachnoclostridium | 0.0022 | 0.0005 | 0.0038 | 0.0097 | 0.0022 | 0.0037 |
| Niastella | 0.0054 | 0.0016 | 0.0205 | 0.0016 | 0.0027 | 0.0064 |
| Roseburia | 0.0167 | 0.0146 | 0.0162 | 0.0173 | 0.0103 | 0.0150 |
| hoa5-07d05_gut_group | 0.0157 | 0.0194 | 0.0232 | 0.0135 | 0.0097 | 0.0163 |
| Tyzzerella_3 | 0.0173 | 0.0113 | 0.0167 | 0.0146 | 0.0103 | 0.0140 |
| Defluviitaleaceae_UCG-011 | 0.0086 | 0.0108 | 0.0200 | 0.0086 | 0.0086 | 0.0113 |
| [Ruminococcus]_gauvreauii_group | 0.0086 | 0.0065 | 0.0146 | 0.0130 | 0.0092 | 0.0104 |
| Lachnospiraceae_FCS020_group | 0.0151 | 0.0151 | 0.0124 | 0.0146 | 0.0086 | 0.0132 |
| Coprococcus_2 | 0.0092 | 0.0081 | 0.0124 | 0.0049 | 0.0140 | 0.0097 |
| [Eubacterium]_ventriosum_group | 0.0200 | 0.0097 | 0.0130 | 0.0119 | 0.0076 | 0.0124 |
| Coprococcus_1 | 0.0097 | 0.0097 | 0.0097 | 0.0086 | 0.0049 | 0.0085 |
| Family_XIII_AD3011_group | 0.0130 | 0.0059 | 0.0146 | 0.0119 | 0.0103 | 0.0111 |
| p-1088-a5_gut_group | 0.0086 | 0.0049 | 0.0065 | 0.0038 | 0.0022 | 0.0052 |
| Erysipelotrichaceae_UCG-009 | 0.0140 | 0.0086 | 0.0157 | 0.0065 | 0.0070 | 0.0104 |
| Prevotella_7 | 0.0011 | 0.0032 | 0.0070 | 0.0113 | 0.0070 | 0.0059 |
| Anaerotruncus | 0.0086 | 0.0081 | 0.0097 | 0.0092 | 0.0054 | 0.0082 |
| Lachnospiraceae_UCG-002 | 0.0130 | 0.0070 | 0.0103 | 0.0113 | 0.0130 | 0.0109 |
| Ruminococcaceae_V9D2013_group | 0.0103 | 0.0038 | 0.0097 | 0.0076 | 0.0049 | 0.0072 |
| Atopobium | 0.0016 | 0.0027 | 0.0065 | 0.0016 | 0.0032 | 0.0031 |
| Ruminiclostridium_6 | 0.0081 | 0.0097 | 0.0178 | 0.0103 | 0.0022 | 0.0096 |
| Marvinbryantia | 0.0043 | 0.0065 | 0.0097 | 0.0076 | 0.0054 | 0.0067 |
| Desulfobulbus | 0.0049 | 0.0038 | 0.0065 | 0.0054 | 0.0032 | 0.0048 |
| Phocaeicola | 0.0000 | 0.0011 | 0.0054 | 0.0027 | 0.0081 | 0.0035 |
| Candidatus_Captivus | 0.0108 | 0.0070 | 0.0065 | 0.0032 | 0.0059 | 0.0067 |
| Zoogloea | 0.0016 | 0.0059 | 0.0065 | 0.0005 | 0.0027 | 0.0035 |
| unidentified_GR-WP33-58 | 0.0027 | 0.0032 | 0.0049 | 0.0038 | 0.0027 | 0.0035 |
| Halomonas | 0.0011 | 0.0016 | 0.0043 | 0.0005 | 0.0043 | 0.0024 |
| Romboutsia | 0.0022 | 0.0016 | 0.0016 | 0.0011 | 0.0005 | 0.0014 |
| Asteroleplasma | 0.0027 | 0.0065 | 0.0092 | 0.0054 | 0.0038 | 0.0055 |
| Lachnospiraceae_UCG-010 | 0.0070 | 0.0054 | 0.0070 | 0.0059 | 0.0011 | 0.0053 |
| Blvii28_wastewater-sludge_group | 0.0081 | 0.0076 | 0.0049 | 0.0065 | 0.0059 | 0.0066 |
| Candidatus_Soleaferrea | 0.0038 | 0.0016 | 0.0027 | 0.0043 | 0.0038 | 0.0032 |
| Tyzzerella | 0.0043 | 0.0032 | 0.0022 | 0.0032 | 0.0027 | 0.0031 |
| Streptococcus | 0.0054 | 0.0022 | 0.0027 | 0.0038 | 0.0000 | 0.0028 |
| Kandleria | 0.0022 | 0.0005 | 0.0011 | 0.0043 | 0.0005 | 0.0017 |
| unidentified_Rhodospirillaceae | 0.0005 | 0.0000 | 0.0038 | 0.0005 | 0.0005 | 0.0011 |
| Syntrophococcus | 0.0027 | 0.0038 | 0.0005 | 0.0022 | 0.0011 | 0.0021 |
| Brevundimonas | 0.0011 | 0.0022 | 0.0054 | 0.0011 | 0.0005 | 0.0021 |
| Blautia | 0.0011 | 0.0022 | 0.0005 | 0.0016 | 0.0027 | 0.0016 |
| Ruminococcaceae_UCG-004 | 0.0043 | 0.0022 | 0.0016 | 0.0022 | 0.0032 | 0.0027 |
| Turicibacter | 0.0016 | 0.0032 | 0.0005 | 0.0011 | 0.0000 | 0.0013 |
| Candidatus_Bacilloplasma | 0.0011 | 0.0032 | 0.0005 | 0.0038 | 0.0005 | 0.0018 |
| Ruminococcaceae_UCG-009 | 0.0011 | 0.0038 | 0.0022 | 0.0016 | 0.0011 | 0.0019 |
| Mannheimia | 0.0022 | 0.0005 | 0.0038 | 0.0011 | 0.0005 | 0.0016 |
| Coxiella | 0.0027 | 0.0016 | 0.0011 | 0.0011 | 0.0022 | 0.0017 |
| Alysiella | 0.0027 | 0.0005 | 0.0011 | 0.0005 | 0.0022 | 0.0014 |
| Moraxella | 0.0016 | 0.0027 | 0.0005 | 0.0011 | 0.0005 | 0.0013 |
| Anaerofustis | 0.0022 | 0.0032 | 0.0022 | 0.0027 | 0.0011 | 0.0023 |
| Others | 39.2039 | 38.7009 | 34.8226 | 27.4147 | 31.0361 | 34.2356 |

The treatments HS1, HS2, HS3, HS4 and HS5 refer to the C:F ratios of 0:100, 15:85, 30:70, 45:55 and 60:40, respectively.

**Table S5** The relative abundance of the 8 most dominant bacteria at the phylum level

| Item | Groups (%)b | | | | | SEM | P-values c |
| --- | --- | --- | --- | --- | --- | --- | --- |
| HS1 | HS2 | HS3 | HS4 | HS5 |
| *Bacteroidetes* | 51.28bc | 44.88c | 48.29c | 67.50a | 63.17ab | 6.74 | <0.05 |
| *Proteobacteria* | 20.24ab | 26.48a | 20.83ab | 10.90b | 15.16b | 6.93 | <0.05 |
| *Firmicutes* | 14.01 a | 12.04 a | 16.25a | 14.75 a | 10.37 a | 3.68 | >0.05 |
| *Lentisphaerae* | 5.22 a | 6.69 a | 4.31a | 3.38 a | 7.15 a | 1.87 | >0.05 |
| *Fibrobacteres* | 0.98 a | 1.74 a | 0.89 a | 0.56 a | 0.87 a | 0.36 | >0.05 |
| *Cyanobacteria* | 0.90a | 1.01 a | 1.19 a | 0.75 a | 1.59 a | 0.21 | >0.05 |
| *Acidobacteria* | 1.79a | 1.48a | 1.70a | 0.0098b | 0.0032b | 0.11 | <0.05 |
| *Actinobacteria* | 1.15b | 1.34b | 2.13a | 0.03c | 0.018c | 0.12 | <0.05 |

a letters which differ in the same row indicate a significant difference between values within a row.

b Groups HS1, HS2, HS3, HS4 and HS5 refer to the C:F ratios of 0:100, 15:85, 30:70, 45:55 and 60:40, respectively.

c Values in the same row with different superscripts are significantly different (P<0.05)

**Table S6** The effect of increases dietary concentrate on the rumen bacteria at the genus level

| Item | | Groups (%)a | | | | | | SEM | P-values b |
| --- | --- | --- | --- | --- | --- | --- | --- | --- | --- |
| HS1 | | HS2 | HS3 | HS4 | HS5 |
| | *Prevotella_1* | | --- | | | | 19.62b | 18.31b | 21.80ab | 39.17a | 35.15a | 3.10 | <0.05 |
| *Succinivibrionaceae_UCG-002* | | | 5.29b | 11.02a | 6.05ab | 6.12ab | 7.08ab | 2.25 | >0.05 |
| *Ruminobacter* | 7.59a | | | 6.09b | 7.68ab | 3.44ab | 5.36ab | 1.13 | >0.05 |
| *Rikenellaceae_RC9_gut_group* | 6.21a | | | 4.68a | 5.41a | 3.51a | 3.85a | 1.23 | >0.05 |
| *Erysipelotrichaceae_UCG-004* | 1.53a | | | 1.15a | 1.21a | 0.88a | 0.68a | 0.41 | >0.05 |
| *Prevotellaceae_UCG-003* | 2.65a | | | 1.97a | 2.19a | 3.21a | 3.22a | 0.25 | >0.05 |
| *Succinivibrio* | 0.80b | | | 1.69a | 0.82b | 0.36b | 1.11ab | 0.06 | >0.05 |
| *Fibrobacter* | 0.98a | | | 1.74a | 0.89a | 0.56a | 0.87a | 0.24 | >0.05 |
| *Prevotellaceae_UCG-001* | 0.96a | | | 0.76a | 1.10a | 1.70a | 1.63a | 0.25 | >0.05 |
| *Ruminococcus_2* | 0.54a | | | 0.38a | 0.59a | 1.26a | 0.41a | 0.14 | >0.05 |
| *Christtensenellaceae_UCG-001* | 1.18a | | | 0.96a | 1.60a | 1.34a | 1.02a | 0.50 | >0.05 |
| *Ruminococcaceae_NK4A214_group* | 1.05a | | | 0.88a | 1.49a | 1.24a | 0.80a | 0.41 | >0.05 |

a Groups HS1, HS2, HS3, HS4 and HS5 refer to the C:F ratios of 0:100, 15:85, 30:70, 45:55 and 60:40, respectively.

b Values in the same row with different superscripts are significantly different (P<0.05).
